# Supplementary material for: Effects of FDA Advisories on the Pharmacologic Treatment of ADHD, 2004–2008
Source: Atypon-hosted journal article supplement (doi:10.1176/appi.ps.201200147), 2013-01-15
Supplement: 339_ds001.pdf [file 339_ds001.pdf]

**APPENDIX. THERAPEUTIC CLASSES**

Data Supplement for Kornfield et al. (10.1176/appi.ps.201200147)

| <b>Stimulants</b>    | <b>Atomoxetine</b> | <b>Adderall</b> | <b>Substitutes</b>  |
|----------------------|--------------------|-----------------|---------------------|
| ADDERALL             | STRATTERA          | ADDERALL        | CATAPRES            |
| ADDERALL XR          |                    | ADDERALL XR     | CATAPRES TTS        |
| AMPHETAMINE SALTS    |                    |                 | CLONIDINE HCL       |
| AMPHETAMINE SALTS ER |                    |                 | CLONIDINE TTS       |
| AMPHETAMINE SULF     |                    |                 | CLONIDINE ER        |
| CONCERTA             |                    |                 | CLONIDINE/CHLORLTHL |
| CYLERT               |                    |                 | GUANFACINE HCL      |
| DAYTRANA             |                    |                 | TENEX               |
| DEXEDRINE            |                    |                 | BUPROPION HCL       |
| DEXTROAMPHETAMINE    |                    |                 | BUPROPION HCL SR    |
| DEXTROSTAT           |                    |                 | BUPROPION HCL XL    |
| FOCALIN              |                    |                 | WELLBUTRIN XL       |
| FOCALIN XR           |                    |                 | WELLBUTRIN          |
| METADATE CD          |                    |                 | WELLBUTRIN SR       |
| METADATE ER          |                    |                 | WELLBUTRIN UNSP     |
| METADATE UNSP        |                    |                 |                     |
| METHYLIN - MKR       |                    |                 |                     |
| METHYLIN - SE2       |                    |                 |                     |
| METHYLIN - SGI       |                    |                 |                     |
| METHYLIN ER          |                    |                 |                     |
| METHYLPHENIDATE      |                    |                 |                     |
| PROCENTRA            |                    |                 |                     |
| PROVIGIL             |                    |                 |                     |
| RITALIN              |                    |                 |                     |
| RITALIN LA           |                    |                 |                     |
| RITALIN-SR           |                    |                 |                     |
| VYVANSE              |                    |                 |                     |

## ANALYSES STRATIFIED BY PRIMARY CARE PHYSICIANS AND SPECIALISTS.

| PRIMARY CARE PHYSICIANS                 |                       |                      |             |                 |                              |                        |                      |              |                 |                              |                         |                      |             |                 |                              |                        |                      |             |                 |                              |
|-----------------------------------------|-----------------------|----------------------|-------------|-----------------|------------------------------|------------------------|----------------------|--------------|-----------------|------------------------------|-------------------------|----------------------|-------------|-----------------|------------------------------|------------------------|----------------------|-------------|-----------------|------------------------------|
|                                         | ALL STIMULANTS        |                      |             |                 |                              | ADDERALL               |                      |              |                 |                              | NON-ADDERALL STIMULANTS |                      |             |                 |                              | ATOMOXETINE            |                      |             |                 |                              |
|                                         | Dif. in market share* | Average Market Share | Slope       | Change in Slope | Pred. share at end of period | Dif. in market share** | Average Market Share | Slope        | Change in Slope | Pred. share at end of period | Dif. in market share*   | Average Market Share | Slope       | Change in Slope | Pred. share at end of period | Dif. in market share** | Average Market Share | Slope       | Change in Slope | Pred. share at end of period |
| Pre advisory period JAN 04 – JAN 05     | —                     | 79.82 %              | .21%/month  | —               | 81.21%                       | —                      | 36.12 %              | .24%/month   | —               | 37.51 %                      | —                       | 43.70 %              | -.06%/month | —               | 43.24 %                      | —                      | 21.10 %              | -.21%/month | —               | 19.93 %                      |
| After Adderall PHA FEB 05 – AUG 05      | +2.83%                | 84.86 %              | -.02%/month | -.23%/month     | 84.19%                       | -4.76%                 | 33.64 %              | .20%/month   | -.04%/month     | 34.18 %                      | +8.59 %                 | 51.22 %              | -.22%/month | -.16%/month     | 50.52 %                      | -5.40 %**<br>(.02)     | 14.74 %              | .32%/month  | +.53%/month     | 16.26 %                      |
| After atomoxetine PHA SEPT 05 – JAN 07  | +5.49%                | 91.19 %              | .21%/month  | +.23%/month     | 93.10%                       | +2.15%                 | 34.52 %              | -.25%/month  | -.45%/month     | 32.53 %                      | +2.50 %                 | 56.67 %              | .49%/month  | +.71%/month     | 60.57 %                      | -5.70 %**<br>(.02)     | 9.84%                | -.15%/month | -.48%/month     | 8.41 %                       |
| After all ADHD meds PHA FEB 07 – DEC 08 | -2.66%                | 91.66 %              | .10%/month  | -.11%/month     | 92.83%                       | +2.99%                 | 28.95 %              | -.58%/month  | -.33%/month     | 23.11 %                      | -5.61 %                 | 62.72 %              | .69%/month  | +.20%/month     | 69.85 %                      | +1.18 %                | 8.64%                | -.08%/month | +.07%/month     | 7.72 %                       |
| SPECIALISTS                             |                       |                      |             |                 |                              |                        |                      |              |                 |                              |                         |                      |             |                 |                              |                        |                      |             |                 |                              |
|                                         | ALL STIMULANTS        |                      |             |                 |                              | ADDERALL               |                      |              |                 |                              | NON-ADDERALL STIMULANTS |                      |             |                 |                              | ATOMOXETINE            |                      |             |                 |                              |
|                                         | Dif. in market share* | Average Market Share | Slope       | Change in Slope | Pred. share at end of period | Dif. in market share** | Average Market Share | Slope        | Change in Slope | Pred. share at end of period | Dif. in market share*   | Average Market Share | Slope       | Change in Slope | Pred. share at end of period | Dif. in market share** | Average Market Share | Slope       | Change in Slope | Pred. share at end of period |
| Pre advisory period JAN 04 – JAN 05     | —                     | 84.62%               | -.21%/month | —               | 83.80 %                      | —                      | 37.49%               | -.30%/month  | —               | 35.63 %                      | —                       | 47.12%               | .12%/month  | —               | 47.93 %                      | —                      | 16.05%               | .73%/month  | —               | 20.21 %                      |
| After Adderall PHA FEB 05 – AUG 05      | +3.54%                | 86.56%               | -.40%/month | -.19%/month     | 84.71 %                      | +14.22 %**<br>(.02)    | 41.51%               | 2.67 %/month | -2.37%/month*   | 33.56 %                      | -9.67 %                 | 45.05%               | 2.19%/month | +2.06%/month    | 51.50 %                      | -8.50 %**<br>(.001)    | 11.32%               | -.23%/month | -.96%/month     | 11.08 %                      |
| After atomoxetine PHA SEPT 05 – JAN 07  | +1.40%                | 85.65%               | -.01%/month | +.39%/month     | 85.51 %                      | 8.89%                  | 37.51%               | -.26 %/month | +2.41%/month**  | 35.65 %                      | -8.69 %                 | 48.14%               | .38%/month  | -1.80%/month    | 51.14 %                      | +2.37 %                | 12.26%               | -.11%/month | +.12%/month     | 11.47 %                      |
| After all ADHD meds PHA FEB 07 – DEC 08 | +1.40%                | 88.12%               | .13%/month  | +.14%/month     | 89.65 %                      | -3.40 %                | 24.94%               | -.67 %/month | -.41%/month     | 17.95 %                      | +2.94 %                 | 63.18%               | .81%/month  | +.42%/month     | 71.42 %                      | -1.07 %                | 9.40%                | -.11%/month | +.00%/month     | 8.02 %                       |

\*Difference between 1) the predicted market share at the beginning of the new time segment based on the regression for the prior time segment and 2) the predicted market share based on the regression for the new time segment.

\*\*Significant at the .05 level

Source: IMS Health National Disease and Therapeutic Index, 2004-2008
